# Supplementary material for: Two-dimensional MXene enabled carbon quantum dots@Ag with enhanced catalytic activity towards the reduction of p-nitrophenol
Source: Royal Society of Chemistry journal article supplement (doi:10.1039/d1ra09177h), 2022-01-01
Supplement: d1ra09177h1.pdf [file d1ra09177h1.pdf]

1 **Supplementary Material**

2

3 **Two-dimensional MXene enabled carbon quantum dots@Ag**  
4 **with enhanced catalytic activity towards the reduction of *p*-**  
5 **nitrophenol**

6 Yingxin Chen <sup>a</sup>, Chunli Yang <sup>a</sup>, Xiaotong Huang <sup>a</sup>, Na Yu <sup>a</sup>, Lu Li <sup>a</sup>, Huan Xie <sup>a</sup>, Zebin Zhu  
7 <sup>a</sup>, Yong Yuan <sup>b</sup>, Lihua Zhou <sup>a\*</sup>

8 <sup>a</sup>School of Biomedical and Pharmaceutical Sciences, Guangdong University of  
9 Technology, Guangzhou, 510006, P.R. China.

10 <sup>b</sup> School of Environmental Science and Engineering, Guangdong University of  
11 Technology, Guangzhou, 510006, P.R. China.

12

13 \* Corresponding author:

14 E-mail: qhzhoulh@gdut.edu.cn (L. Zhou); Tel: +8620- 85827854

15

16

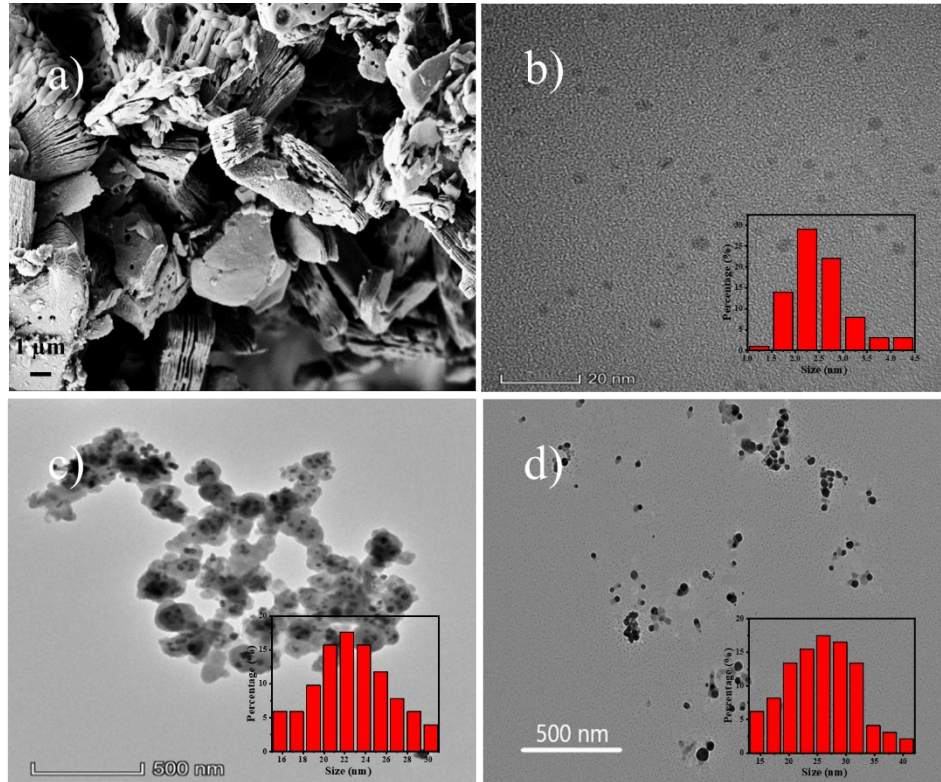

17

18 Fig. S1 (a) SEM image of MXene; TEM images of CQDs (b), CQD@Ag/MXene  
 19 (c) and CQD@Ag (d), inset of (b), (c) and (d) are particle size distribution of CQDs,  
 20 CQD@Ag/MXene and CQD@Ag, respectively.

21

22

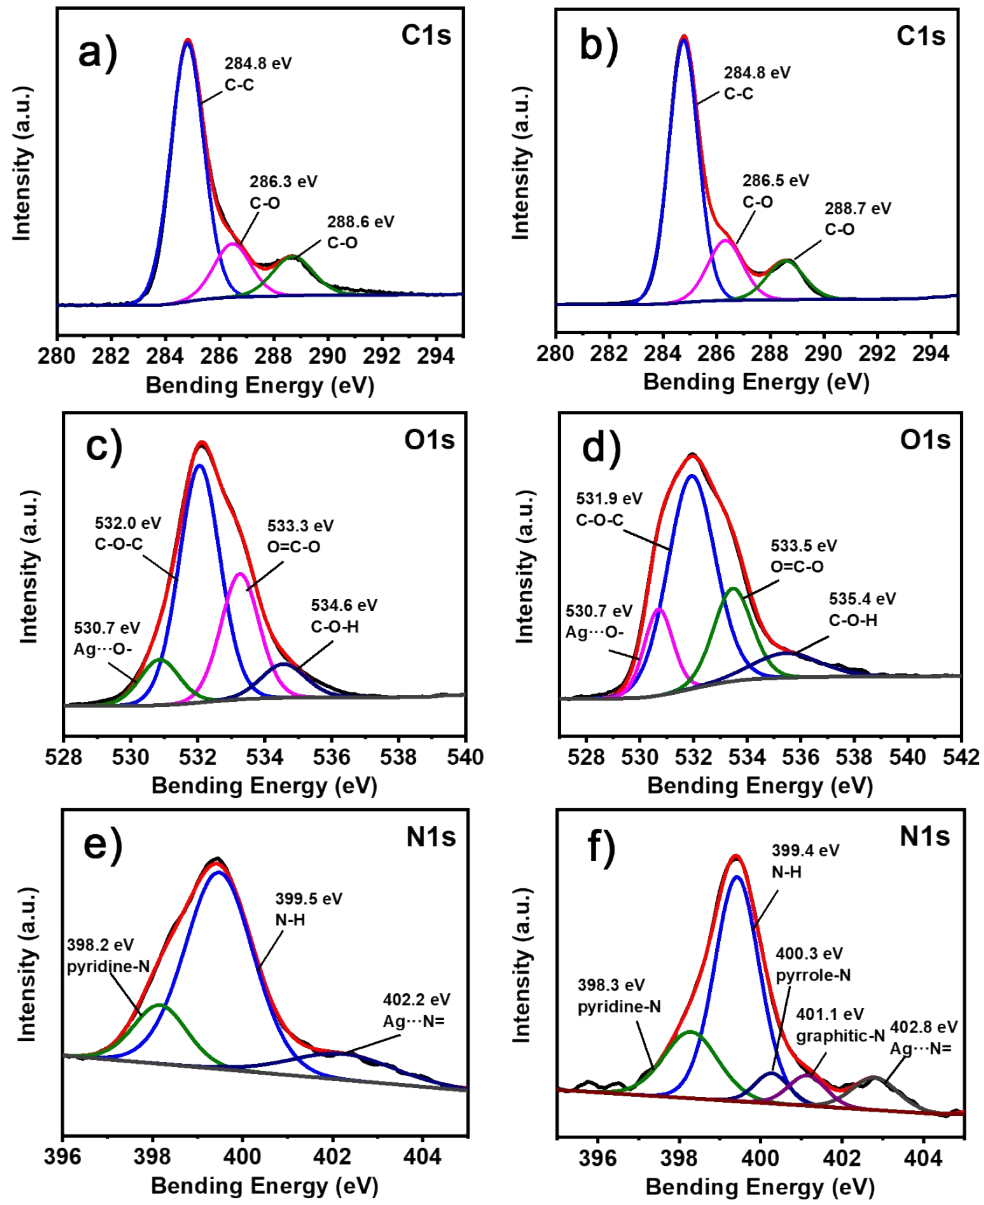

24 Fig. S2 High-resolution XPS spectra of (a) C1s, (c)O1s, (e)N1s of CQD@Ag, (b) C1s,

25 (d)O1s, (f)N1s of CQD@Ag/MXene.

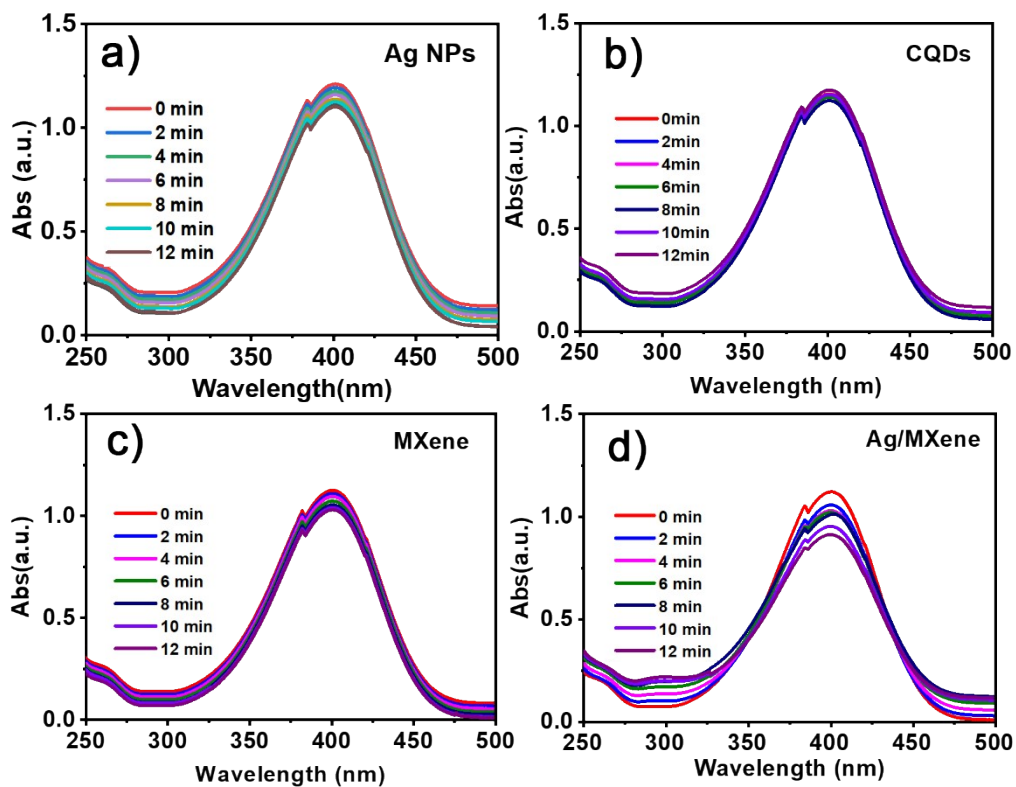

27

28 Fig. S3 UV-vis absorption spectra during the catalytic reduction of PNP with (a) Ag

29 NPs, (b) CQDs, (c) MXene and (d) Ag/MXene.

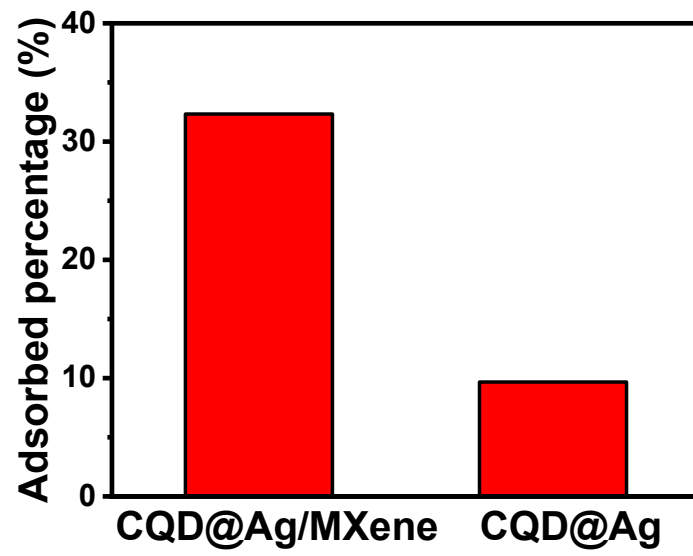

31

32

Fig. S4 The adsorption of PNP by CQD@Ag/MXene and CQD@Ag

33
